# Supplementary material for: Self-assembly of l-glutamate based aromatic dendrons through the air/water interface: morphology, photodimerization and supramolecular chirality
Source: Royal Society of Chemistry journal article supplement (doi:10.1039/b923595g), 2010-01-01
Supplement: b923595g.pdf [file b923595g.pdf]

## Electronic Supplementary Information

*for*

### Self-assembly of L-Glutamate based Aromatic dendrons through the air/water interface: morphology, photodimerization and supramolecular chirality

Pengfei Duan and Minghua Liu\*

*Beijing National Laboratory for Molecular Science, Institute of Chemistry, Chinese*

*Academy of Sciences, P. R. China, 100190. E-mail: [liumh@iccas.ac.cn](mailto:liumh@iccas.ac.cn)*

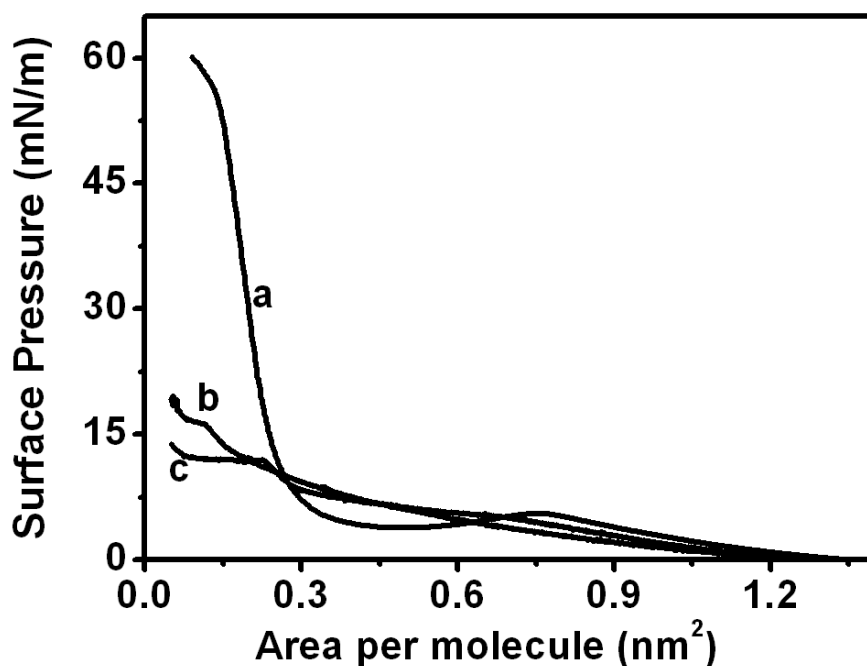

**Fig. S1.** Surface pressure-area isotherms of 2-AGE monolayers: (a) without UV irradiation, (b) in situ UV irradiating in the monolayer, and (c) spreading film from the photo-irradiated solution.
